# Supplementary material
Source: Elsevier journal article supplement (https://authors.library.caltech.edu/61969/2/mmc1.pdf)
Supplement: mmc1 [file mmc1.pdf]

## CURRICULUM VITAE

### ERNST K. ZINNER

- Born:** January 30, 1937, in Steyr, Austria
- Education:** Technische Hochschule, Vienna, Dipl. Ing. (equivalent to M.S.), Physics, 1960  
Washington University, St. Louis, MO, Ph.D., Physics, 1972
- Employment:** 1963-1964: Instructor of Physics, College for Veterinary Medicine, Vienna  
1964-1965: Programming and calculation of magnetic field distributions  
Brown-Boveri Co., Baden, Switzerland  
1972-1974: Research Associate, Laboratory for Space Physics, Washington  
University, St. Louis, MO  
1974-1989: Senior Research Scientist, McDonnell Center for the Space Sciences  
Washington University, St. Louis, MO  
1980-1982: Guest Professor, Technical University Vienna, Austria  
1989-1991: Research Professor of Physics, McDonnell Center for the Space  
Sciences, Washington University, St. Louis, MO  
1991-present: Research Professor of Physics and Earth and Planetary Sciences  
McDonnell Center for the Space Sciences, Washington University, St.  
Louis, MO

**Scientific Work:** Dissertation research in high energy physics on the decay  $K^+ \rightarrow \pi^0 \mu^+ \nu$ . Work on the effects of the interplanetary environment on the moon and meteoritic parent bodies, based on the study of nuclear particle tracks, solar wind implanted elements and micrometeoroid craters. Team leader of the Washington University-JSC-MPI Heidelberg-Univ. Munich LDEF interplanetary dust experiment which was launched in April 1984 and retrieved in January 1990. Ion microprobe isotopic and trace element studies of meteorites and interplanetary dust with implications for early solar system chronology, nucleosynthesis of elements in stars and the history of presolar material. Discovery of interstellar grains in meteorites. Member of the Antarctic meteorite collection team 1985-1986. Team member of the Stardust mission preliminary examination team.

**Professional Societies:**

American Physical Society  
Meteoritical Society  
American Association for the Advancement of Science  
American Geophysical Union  
Sigma Xi

**Honors and Awards:**

Venia Legendi, Technical University Vienna, Austria, 1985  
Antarctic Service Medal, National Science Foundation, 1987  
Elected Fellow of the Meteoritical Society, 1988  
Elected Fellow of the American Physical Society, 1991

J Lawrence Smith Medal of the National Academy of Sciences, 1997  
 Leonard Medal of the Meteoritical Society, 1997  
 Geochemistry Fellow of the Geochem. Society and the Europ. Assoc. for  
 Geochemistry, 1998  
 Corresponding Member of the Austrian Academy of Sciences, 2002  
 Elected Fellow of the American Association for the Advancement of Science, 2011

Committees: Member, Lunar Science Review Panel, 1976-1978  
 Associate Editor, Proceedings 10th Lunar and Planetary Science Conference, 1979  
 Member, Organizing Committee, SEM/1988  
 Member, Geodynamics Committee Task Group (NAS) on Geochemical  
 Instrumentation, 1988  
 Member, ESA/NASA Science Definition Team of Rosetta (Comet Nucleus Sample  
 Return Mission), 1988-1991  
 Member, Program Committee, Int. Workshop on Physics and Mechanics of Cometary  
 Materials, 1989  
 Session Advocate, GSA 1989 Annual Meeting  
 Symposium Convenor, 7th Int. Conf. on Geochronology, Cosmochronology and  
 Isotope Geology, 1990  
 Member, Steering Committee, NASA Workshop on Isotopic Anomalies, 1990  
 Member, Lunar and Planetary Geoscience Review Panel, 1992-1994  
 Chairman, Organizing Committee, NASA Workshop on Isotopic Anomalies, 1993  
 Member, Program Committee, Nuclei in the Cosmos III, 1994  
 Member, Organizing Committee, Goldschmidt Conference, 1994  
 Member, Organizing Committee, Workshop on Stellar Evolution, 1994  
 Member, Program Committee, Nuclei in the Cosmos IV, 1996  
 Member, Organizing Committee, Conference on the Astrophysical Implications of the  
 Laboratory Study of Presolar Materials, 1996  
 Associate Editor, Meteoritics and Planetary Science, 1996-2005  
 Member, Program Committee, 2nd Symposium on Atomic and Nuclear Physics in the  
 Universe, 1997  
 Member, IAU Working Group on Abundances in Red Giants, 2001–  
 Member, Scientific Organizing Committee and Associate Editor, Workshop on Chondrites  
 and the Protoplanetary Disk, 2004  
 Member, Scientific Organizing Committee, Astrophysics with Radioactivities V, 2005  
 Member, Scientific Organizing Committee, Joint Discussion on AGB Stars, IAU  
 Symposium, 2006  
 Member, Scientific Advisory Committee, 9<sup>th</sup> Torino workshop, 2007  
 Member, Scientific Organizing Committee, IAU Symposium “Organic Matter in Space”,  
 2008  
 Member, International Advisory Committee, Nuclei in the Cosmos X, 2008  
 Member, International Advisory Committee, Nuclei in the Cosmos XI, 2010

Visits: Visiting Scientist, Max-Planck-Institut f. Kernphysik, Heidelberg, Germany, May 1980  
 Visiting Scientist, Max-Planck-Institut für Chemie, Mainz, Germany, June 1980  
 Visiting Scientist, University of Pavia, Italy, July-September 1989  
 Visiting Professor, University of Bern, Switzerland, July-September 1994

Visiting Fellow, Australian National University, Canberra, June-July 1995  
Visiting Scientist, Max-Planck-Institut für Chemie, Mainz, Germany, June-September 2001  
Visiting Fellow, Australian National University, Canberra, December 2002  
Visiting Scientist, Max-Planck-Institut für Chemie, Mainz, Germany, June-September 2003  
Visiting Scientist, Max-Planck-Institut für Chemie, Mainz, Germany, September 2004  
Visiting Scientist, Museum National d'Histoire Naturelle, Paris, July 2006  
Tuve Fellow, Carnegie Institution of Washington, April-May 2010  
Visiting Scientist, University of Perugia, Italy, October 2011  
Visiting Scientist, University of Granada, Spain, May 2013

Invited Presentations:

Conference on the Ancient Sun, Boulder, 1979  
160th Meeting of the Electro Chem. Society, Denver, 1981  
AIAA Shuttle Environment and Operations Meeting, Washington, DC, 1983  
6th Intl. Conf. Geochronology, Cosmochronology and Isotope Geology, Cambridge, UK, 1986.  
AGU Spring Meeting, Baltimore, 1987.  
USGS Workshop on New Frontiers in Stable Isotope Research, Reston, VA, 1988  
V. M. Goldschmidt Conference, Baltimore, 1990  
ESF Workshop, Bad Honnef, West Germany, 1990  
Alfred Nier Symposium, Durango, CO, 1991  
SIMS VIII, Amsterdam, 1991  
German Mineralogical Society, München, Germany, 1993  
Nuclei in the Cosmos III, Gran Sasso, Italy, 1994  
57th Meteoritical Society Meeting, Prague, Czech Republic, 1994  
XXII General Assembly, IAU, The Hague, Netherlands, 1994  
20th Symposium on Antarctic Meteorites, Tokyo, Japan, 1995  
6th Annual October Astrophysics Conference in Maryland, 1995  
Symposium on Nuclear Astrophysics, Caltech, Pasadena, 1995  
Todai International Symposium on Cosmochronology and Isotope Science, University of Tokyo, 1996  
Nuclei in the Cosmos IV, Notre Dame, IN, 1996  
Godfrey Distinguished Lecture, Clemson University, 1997  
Gordon Conference on Origins of Solar Systems, New Hampshire, 1997  
60th Meteoritical Society Meeting, Maui. Leonard medalist award talk, 1997  
SIMS XI, Orlando FL, 1997  
Dust in the Local Interstellar Medium, ISSI Workshop, Bern, Switzerland, 1998  
Workshop on "The Early Solar System", MPI Mainz, Germany, 2000  
Nucleosynthesis 2000, ACS Meeting, Washington, D.C., 2000  
63rd Meteoritical Society Meeting. Chicago, 2000  
Robert M. Walker Symposium, St. Louis, MO, 2003  
Enrico Fermi Institute Symposium, Univ. of Chicago, 2003  
The 16th Sanibel Conference on Mass Spectrometry, 2004  
DANCE Workshop, Santa Fe, NM, 2004  
Nuclei in the Cosmos VIII, Vancouver, Canada, 2004  
40<sup>th</sup> Anniversary of the Karlsruhe Van de Graaff, Karlsruhe, Germany, 2004  
15<sup>th</sup> Ann. Goldschmidt Conference, Moscow, Idaho, 2005

AAS Meeting, Minneapolis, MN, 2005  
Astronomy with Radioactivities V, Clemson, SC, 2005  
AAAS Annual Meeting, St. Louis, MO, 2006  
Nuclear Astrophysics: Beyond the first 50 years, Pasadena, CA, 2007  
Ninth Torino Workshop, Perugia, Italy, 2007  
IAU Symposium "Organic Matter in Space", Hong Kong, 2008  
European Week of Astronomy and Space Science, Hatfield, UK, 2009  
Gordon Research Conference "Origins of Solar Systems", South Hadley, MA, 2009  
Tuve Lecture, Carnegie Institution of Washington, 2010  
WE-Heraeus Summer School on Nuclear Astrophysics in the Cosmos, Darmstadt, Germany, 2010  
74<sup>th</sup> Meteoritical Society Meeting, Greenwich, England, 2011  
St. Louis Astronomical Society, 2012  
Dust on core-collapse supernovae near & far: understanding its formation and evolution. Ascona, Switzerland, 2012  
Dust in EuroGENESIS environments: from primitive, massive stars to novae. Perugia, Italy, 2012  
Nuclear Physics in Astrophysics VI, Lisbon. Portugal, 2013
